# Supplementary material
Source: PubMed Central journal article supplement (PMC9437617)

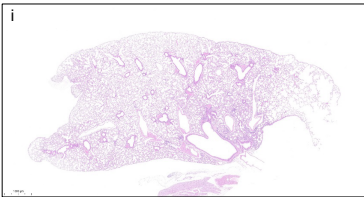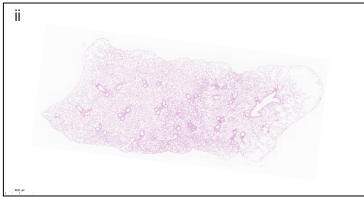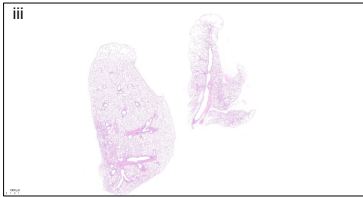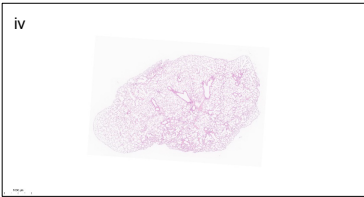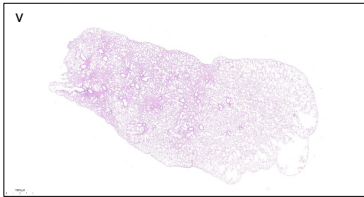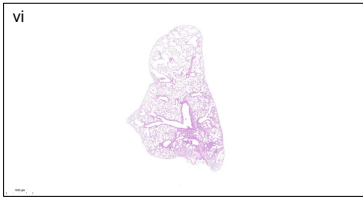

AdC68-S

AdC68

PBS

Supplement: mmc1.pdf [file mmc1.pdf]

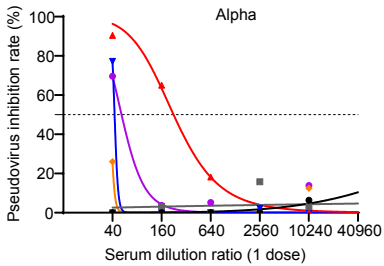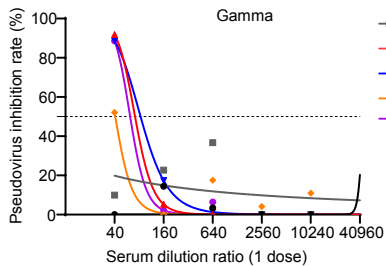

- PBS
- AdC68
- ▲ AdC68-S-1
- ▼ AdC68-S-2
- ◆ AdC68-S-3
- ◆ AdC68-S-4

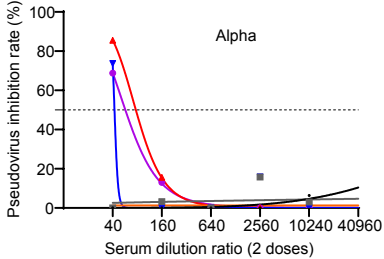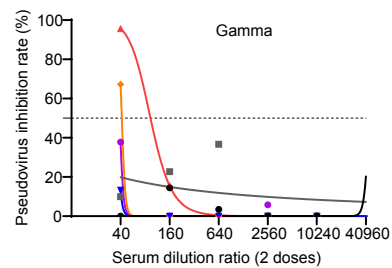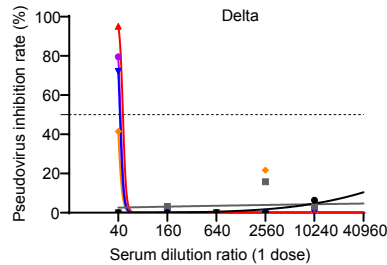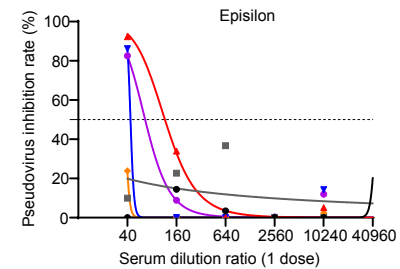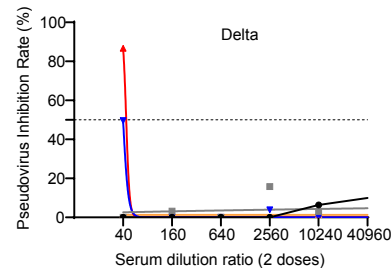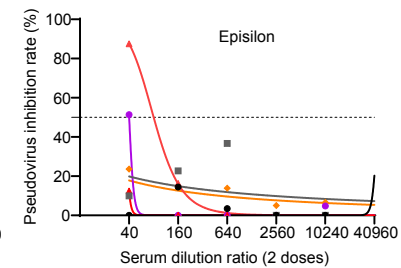

Supplement: mmc2.pdf [file mmc2.pdf]

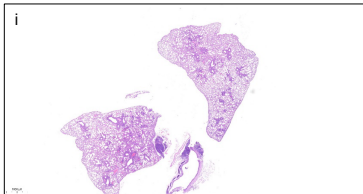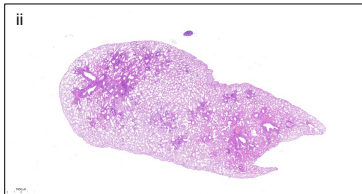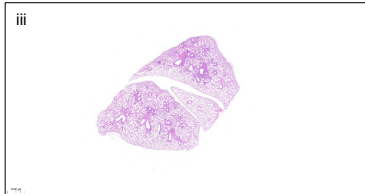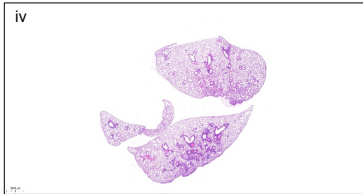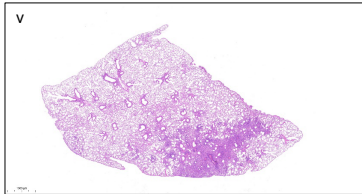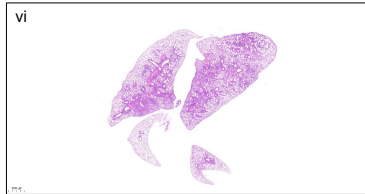

AdC68-S

AdC68

PBS

Supplement: mmc3.pdf [file mmc3.pdf]
